# Supplementary material for: Cognitive fatigue and cortical-striatal network in old age
Source: publisher site journal article supplement (doi:10.18632/aging.101915), 2019-04-17
Supplement: Supplementary file [file aging-v11i8-101915-supplementary-material-SD2.pdf]

## SUPPLEMENTARY TABLE

**Supplementary Table 1. Demographics and clinical characteristics in low- and high-CF group.**

|                                   | <b>Low-CF<br/>(n = 12)</b> | <b>High-CF<br/>(n = 14)</b> | <b>Mann-Whitney U or <math>\chi^2</math> test (p<br/>value)</b> |
|-----------------------------------|----------------------------|-----------------------------|-----------------------------------------------------------------|
| Age, Median (IQR)                 | 72.50 (6.50)               | 69.50 (7.75)                | .63                                                             |
| Male, n (%)                       | 5 (41.6)                   | 3 (21.4)                    | .27                                                             |
| Years of education, Median (IQR)  | 18.00 (7.00)               | 16.00 (2.00)                | .78                                                             |
| MOCA, Median (IQR)                | 29.00 (2.50)               | 28.50 (2.50)                | .86                                                             |
| CF-pre, Median (IQR)              | 1.90 (0.75)                | 1.11 (1.49)                 | .085                                                            |
| CF change, Median (IQR)           | -0.35 (0.97)               | 3.05 (1.86)                 | <b>&lt; .001</b>                                                |
| IIVRT change, Median (IQR)        | -0.018 (0.13)              | 0.016 (0.12)                | .085                                                            |
| Brain atrophy, Median (IQR)       | 0.36 (0.05)                | 0.34 (0.03)                 | .23                                                             |
| Executive abilities, Median (IQR) | 0.58 (0.38)                | 0.70 (0.51)                 | 1.0                                                             |

Note. MOCA, Montreal Cognitive Assessment; CF, cognitive fatigue; IIVRT, intra-individual variability of reaction time; SD, standard deviation; IQR, interquartile range.
